# Supplementary material for: Predictors of Anxiety-Induced Sleep Disturbance among in-School Adolescents in Ghana: Evidence from the 2012 Global School-Based Health Survey
Source: MDPI journal article supplement (doi:10.3390/bs11020020), 2021-02-01
Supplement: s1 [file s1]

**Table S1. Study variables**

| <b>Variables</b>                       | <b>Question</b>                                                                                                             | <b>Response options and recoding</b>                                                                 |
|----------------------------------------|-----------------------------------------------------------------------------------------------------------------------------|------------------------------------------------------------------------------------------------------|
| <b>Outcome variable</b>                |                                                                                                                             |                                                                                                      |
| Anxiety-induced sleep disturbance      | During the past 12 months, how often have you been so worried about something that you could not sleep at night?            | 1 = never to 5 = always (coded 1 - 3 = 0, 4 - 5 = 1)                                                 |
| <b>Explanatory variables</b>           |                                                                                                                             |                                                                                                      |
| Socio-demographic characteristics      |                                                                                                                             |                                                                                                      |
| Age                                    | How old are you?                                                                                                            | 1=12, 2=13, 3=14, 4=15, 5=16, 6=17, 7=18 years (coded as 0=1-14, 15-19)                              |
| Sex                                    | What is your sex?                                                                                                           | 1=male, 2=female (coded 2=0, 1=1)                                                                    |
| Grade                                  | In what grade are you?                                                                                                      | 1=SHS1, 2=SHS2, 3=SHS3, 4=SHS4                                                                       |
| Hunger (proxy of socioeconomic status) | Went hungry past 30 days                                                                                                    | 1=never, 2=Rarely, 3=sometimes, 4=most of the times, 5=always (coded 1-3=0, 4-5=1)                   |
| Psychosocial environmental factors     |                                                                                                                             |                                                                                                      |
| Tobacco use                            | During the past 30 days, on how many days did you use any other form of tobacco, such as chewing tobacco leaves?            | 1 = 0 days; to 7 = All 30 days (coded as 1 = 0; and 2-7 = 1)                                         |
| Alcohol use                            | During the past 30 days, on how many days did you have at least one drink containing alcohol?                               | 1 = 0 days; to 7 = All 30 days (coded as 1 = 0; and 2-7 = 1)                                         |
| Smoking                                | During the past 30 days, how many days did you smoke cigarette?                                                             | 1 = 0 days; to 7 = All 30 days (coded as 1 = 0; and 2-7 = 1)                                         |
| Marijuana use                          | During the past 30 days, how many times have you used marijuana (also called weed, Jah, Indian hemp, ahabammono, and ganja) | 1=0 times; to 5=20 or more times (coded as 1=0; and 2-5=1)                                           |
| Loneliness                             | During the past 12 months, how often have you felt lonely?                                                                  | 1=never, 2=rarely, 3= sometimes, 4 = most of the time to 5 = always (coded as 1-3 = 0; and 4- 5 = 1) |
| Injury                                 | During the past 12 months, how many times were you seriously injured?                                                       | 1 = 0 times; to 8 = 12 or more time (coded as 1 = 0; and 2-8 = 1)                                    |
| Truancy                                | During the past 30 days, on how many days did you miss classes or school without permission?                                | 1=0 days, 2= 1 or 2 days, 3=3 to 5 days, 4=6 to 9 days, 5= 10 or more (coded as 1=0; and 2-5=1)      |
| Suicidal ideation                      | During the past 12 months, did you ever seriously consider attempting suicide?"                                             | 1 = yes, 2 = no (coded 2 = 0; and 1 = 1)                                                             |
| Suicidal attempt                       | During the past 12 months, how many times did you actually attempt suicide?                                                 | 1=0 times; to 5= 6 or more times (coded as 1=0; and 2-5=1)                                           |
| Bullied                                | During the past 30 days, how were you bullied most often?                                                                   | 1 = 0 times; to 8 = 12 or more times (coded as 1 = 0; and 2-7 = 1)                                   |
| Fight                                  | During the past 12 months, how many times were you in a physical fight?                                                     | 1 = 0 times; to 8 = 12 or more times (coded as 1 = 0; and 2-8 = 1)                                   |

|                                                                  |                                                                                                                       |                                                                                                 |
|------------------------------------------------------------------|-----------------------------------------------------------------------------------------------------------------------|-------------------------------------------------------------------------------------------------|
| Injury                                                           | During the past 12 months, how many times were you seriously injured?                                                 | 1 = 0 times; to 8 = 12 or more time (coded as 1 = 0; and 2–8 = 1)                               |
| Attacked                                                         | During the past 12 months, how many times were you physically attacked?                                               | 1=0 days, 2= 1 or 2 days, 3=3 to 5 days, 4=6 to 9 days, 5= 10 or more (coded as 1=0; and 2-8=1) |
| Close friends                                                    | How many close friends do you have?                                                                                   | 1=0 to 4=3 or more (coded as 1=0; and 2-4=1)                                                    |
| Helpful (Peer support)                                           | During the past 30 days, how often were most of the students in your school kind and helpful?                         | 1=never, 2=Rarely, 3=sometimes, 4=most of the times, 5=always (coded as 1-3 = 0; and 4–5 = 1)   |
| Parents check homework (parental supervision)                    | During the past 30 days, how often did your parents or guardians check to see if your homework was done?              | 1=never, 2=Rarely, 3=sometimes, 4=most of the times, 5=always (coded as 1-3 = 0; and 4–5 = 1)   |
| Understand problems (Parental Connectedness)                     | During the past 30 days, how often did your parents or guardians understand your problems and worries?                | 1=never, 2=Rarely, 3=sometimes, 4=most of the times, 5=always (coded as 1-3 = 0; and 4–5 = 1)   |
| Know what adolescent do free time (Parental or guardian Bonding) | During the past 30 days, how often did your parents or guardians really know what you were doing with your free time? | 1=never, 2=Rarely, 3=sometimes, 4=most of the times, 5=always (coded as 1-3= 0; and 4–5 = 1)    |
| Parental or guardian respect for Privacy                         | During the past 30 days, how often did your parents or guardians go through your things without your approval?        | 1 = never; to 5 = always (coded as 1-3= 0; and 4-5 = 1)                                         |
